# Supplementary material for: Assessment on cadmium and lead in soil based on a rhizosphere microbial community
Source: Royal Society of Chemistry journal article supplement (doi:10.1039/c7tx00048k), 2017-01-01
Supplement: c7tx00048k1.pdf [file c7tx00048k1.pdf]

|                                                                                   |                                          |
|-----------------------------------------------------------------------------------|------------------------------------------|
|    | d_Bacteria;p_AD3                         |
|    | d_Bacteria;p_Acidobacteria               |
|    | d_Bacteria;p_Actinobacteria              |
|    | d_Bacteria;p_Armatimonadetes             |
|    | d_Bacteria;p_BRC1                        |
|    | d_Bacteria;p_Bacteroidetes               |
|    | d_Bacteria;p_Candidatus Saccharibacteria |
|    | d_Bacteria;p_Chlamydiae                  |
|    | d_Bacteria;p_Chlorobi                    |
|    | d_Bacteria;p_Chloroflexi                 |
|    | d_Bacteria;p_Cyanobacteria               |
|    | d_Bacteria;p_Cyanobacteria/Chloroplast   |
|    | d_Bacteria;p_Deferribacteres             |
|    | d_Bacteria;p_FBP                         |
|    | d_Bacteria;p_Fibrobacteres               |
|    | d_Bacteria;p_Firmicutes                  |
|    | d_Bacteria;p_Fusobacteria                |
|    | d_Bacteria;p_Gemmatimonadetes            |
|    | d_Bacteria;p_OD1                         |
|    | d_Bacteria;p_Parcubacteria               |
|    | d_Bacteria;p_Planctomycetes              |
|    | d_Bacteria;p_Proteobacteria              |
|    | d_Bacteria;p_SBR1093                     |
|    | d_Bacteria;p_Spirochaetes                |
|    | d_Bacteria;p_Synergistetes               |
|    | d_Bacteria;p_TM6                         |
|    | d_Bacteria;p_TM7                         |
|   | d_Bacteria;p_Verrucomicrobia             |
|  | d_Bacteria;p_WPS-2                       |
|  | d_Bacteria;p_WS2                         |
|  | d_Bacteria;p_candidate division WPS-1    |
|  | d_Bacteria;p_candidate division WPS-2    |
|  | d_Bacteria;p_unclassified                |
